# Supplementary material for: The Borrelia burgdorferi RelA/SpoT Homolog and Stringent Response Regulate Survival in the Tick Vector and Global Gene Expression during Starvation
Source: PLoS Pathog. 2015 Sep 15;11(9):e1005160. doi: 10.1371/journal.ppat.1005160 (PMC4570706; doi:10.1371/journal.ppat.1005160)
Supplement: S1 Table — (XLSX) [file ppat.1005160.s006.xlsx]

## Sheet: WT starve upregulated
X	id	chr	Symbol	GeneID	description	category	stationary	starve	foldChange	log2FoldChange	pval	padj	edgeR.pvalues	edgeR.adjpvalues
1114	BB_K24	lp36	NA	1194229	PF-49 protein	CD	154.618	335.74	2.17141	1.11863	2.83238e-10	5.60001e-09	2.9202e-14	6.03218e-13
817	BB_0844	chr	NA	1195702	lipoprotein	CE	186.8	455.436	2.4381	1.28576	2.12112e-15	1.01229e-13	3.56529e-23	1.97375e-21
828	BB_A05	lp54	NA	1194326	S1 antigen	CE	114.953	240.586	2.09291	1.06551	7.37242e-08	9.11021e-07	4.55596e-11	6.00519e-10
846	BB_A25	lp54	dbpB	1194341	decorin-binding protein B	CE	713.005	1646.98	2.30991	1.20784	1.26528e-23	1.25082e-21	1.00555e-31	9.94055e-30
852	BB_A36	lp54	NA	1194360	lipoprotein	CE	957.33	2448.05	2.55716	1.35454	7.2746e-10	1.25636e-08	7.60351e-23	4.04741e-21
1103	BB_K07	lp36	NA	1194241	lipoprotein	CE	90.6882	223.97	2.46967	1.30432	2.74283e-10	5.50155e-09	3.43282e-16	9.50205e-15
1110	BB_K19	lp36	NA	1194260	lipoprotein	CE	112.006	243.759	2.17631	1.12188	1.13723e-08	1.55834e-07	3.58127e-14	7.1833e-13
1165	BB_M27	cp32-6	revA	1194578	RevA	CE	20.3218	54.3563	2.67478	1.41942	0.000313207	0.00177655	1.13591e-07	8.98343e-07
234	BB_0240	chr	glpF	1195077	glycerol uptake facilitator	TP	329.152	720.217	2.1881	1.12968	6.57378e-16	3.49928e-14	5.90877e-20	2.55554e-18
849	BB_A32	lp54	NA	1194390	hypothetical protein	U	25.7842	58.1414	2.25492	1.17308	0.00137677	0.0064811	2.9452e-06	1.90474e-05
938	BB_D21	lp17	NA	1194014	hypothetical protein	U	1144.23	2350.4	2.05413	1.03853	7.74283e-20	4.87094e-18	3.03528e-29	2.10042e-27
939	BB_D22	lp17	NA	1194017	hypothetical protein	U	190.302	395.082	2.07609	1.05387	1.57915e-10	3.31142e-09	2.81152e-16	7.94112e-15
960	BB_F01	lp28-1	NA	1194073	hypothetical protein	U	22.2824	48.196	2.16297	1.11301	0.00536993	0.0208764	3.88404e-05	0.00020133
1141	BB_L29	cp32-8	NA	1194682	hypothetical protein	U	20.3261	61.4534	3.02337	1.59616	2.34863e-05	0.000172899	1.10427e-09	1.22265e-08
1288	BB_Q37	lp56	NA	1194772	hypothetical protein	U	59.472	122.211	2.05494	1.03909	5.61103e-05	0.000386352	3.63723e-08	3.12666e-07
1294	BB_Q43	lp56	bppA	1194778	protein BppA	U	12.8769	36.1772	2.80947	1.4903	0.00214961	0.00975432	6.14888e-06	3.70002e-05
